# Supplementary material for: The genomic epidemiology of SARS-CoV-2 variants of concern in Kenya
Source: bioRxiv or medRxiv preprint supplement (doi:10.1101/2022.10.26.22281446), 2022-10-27

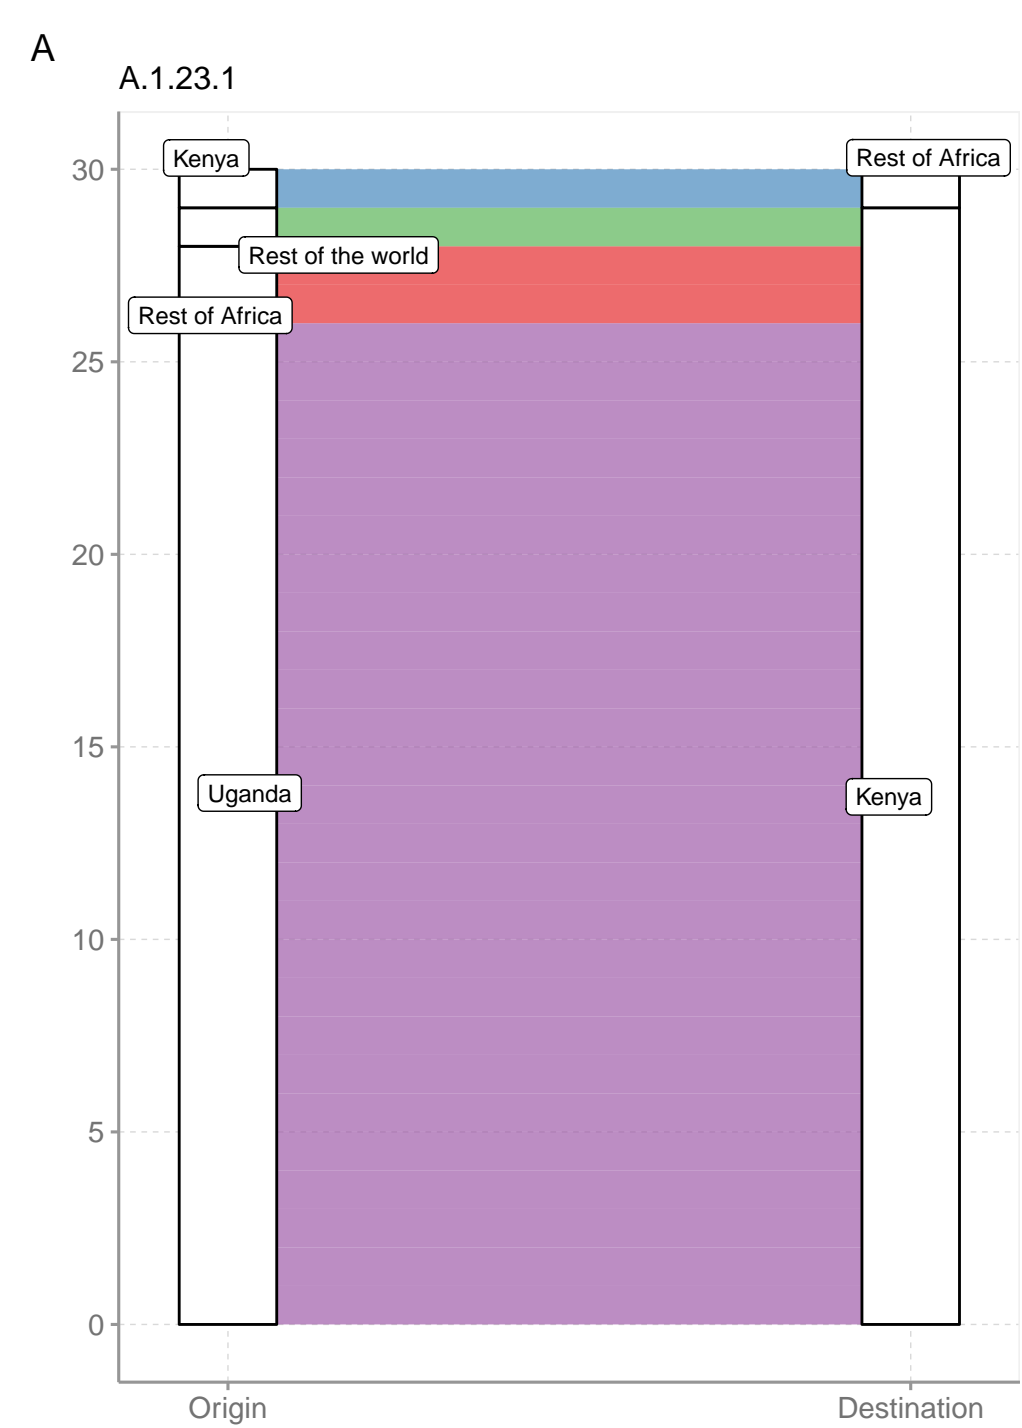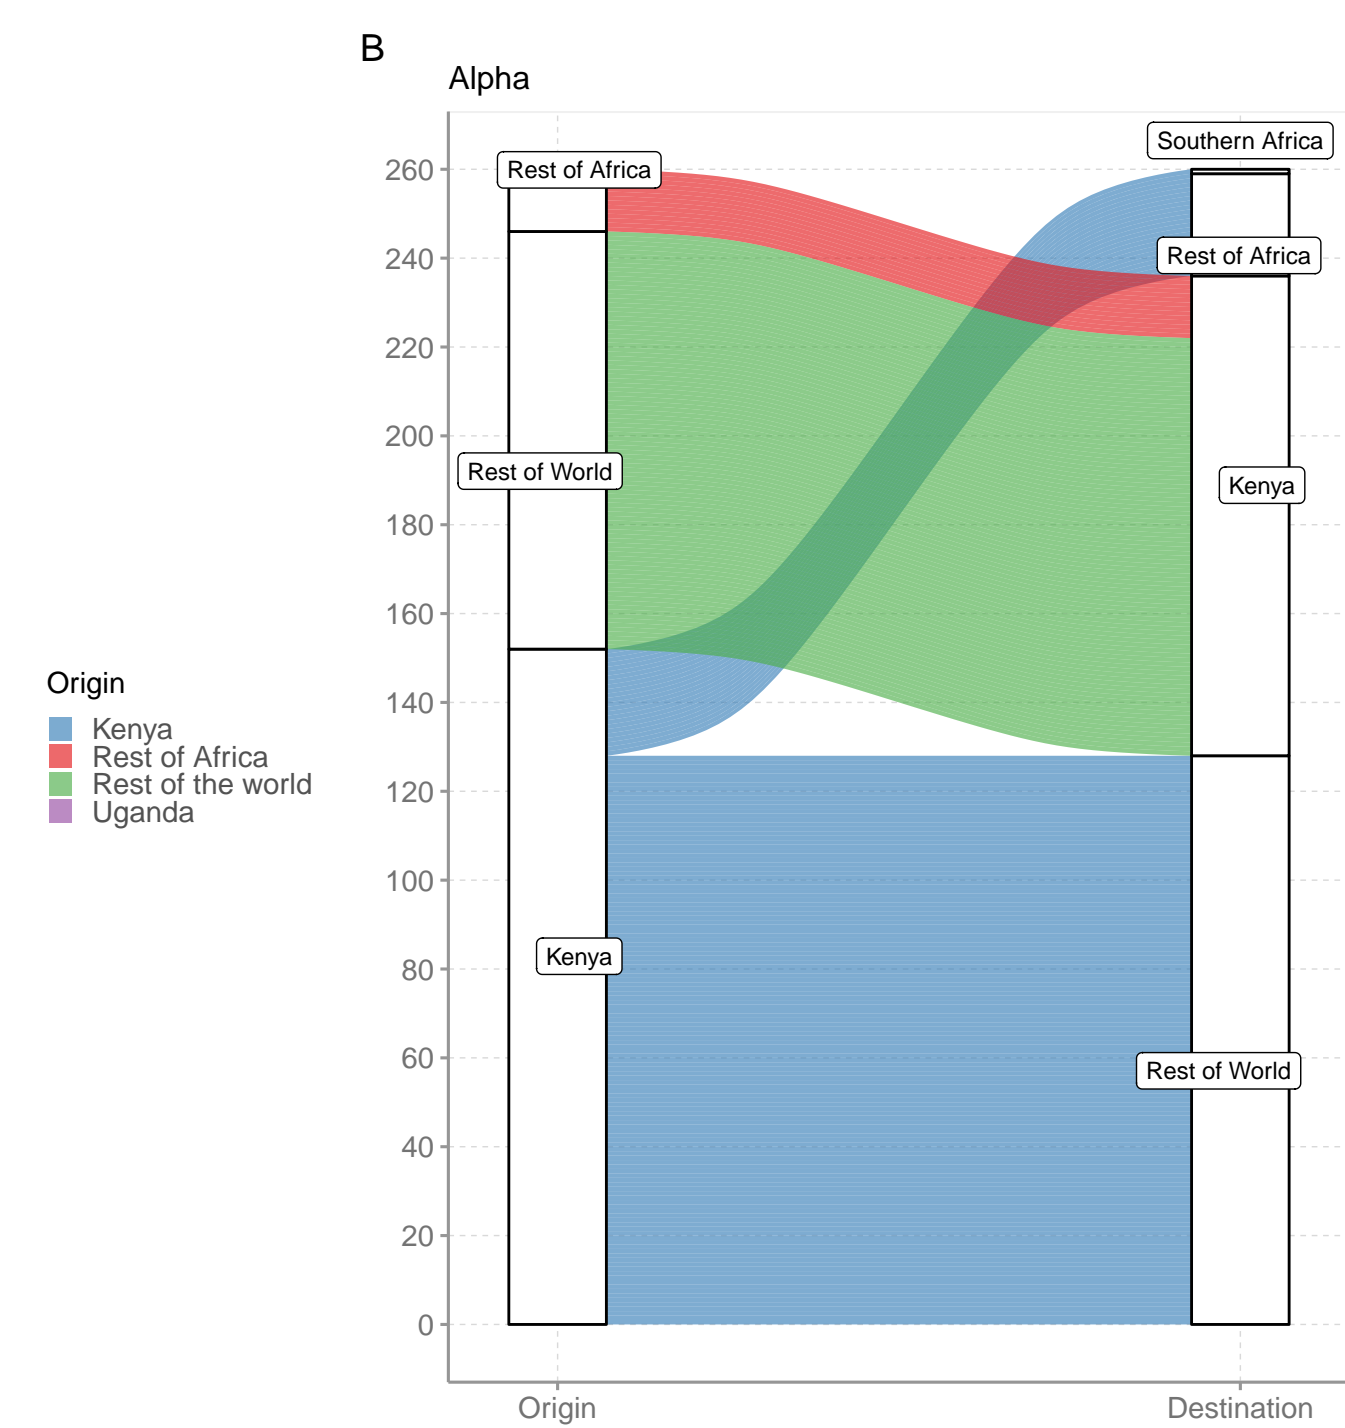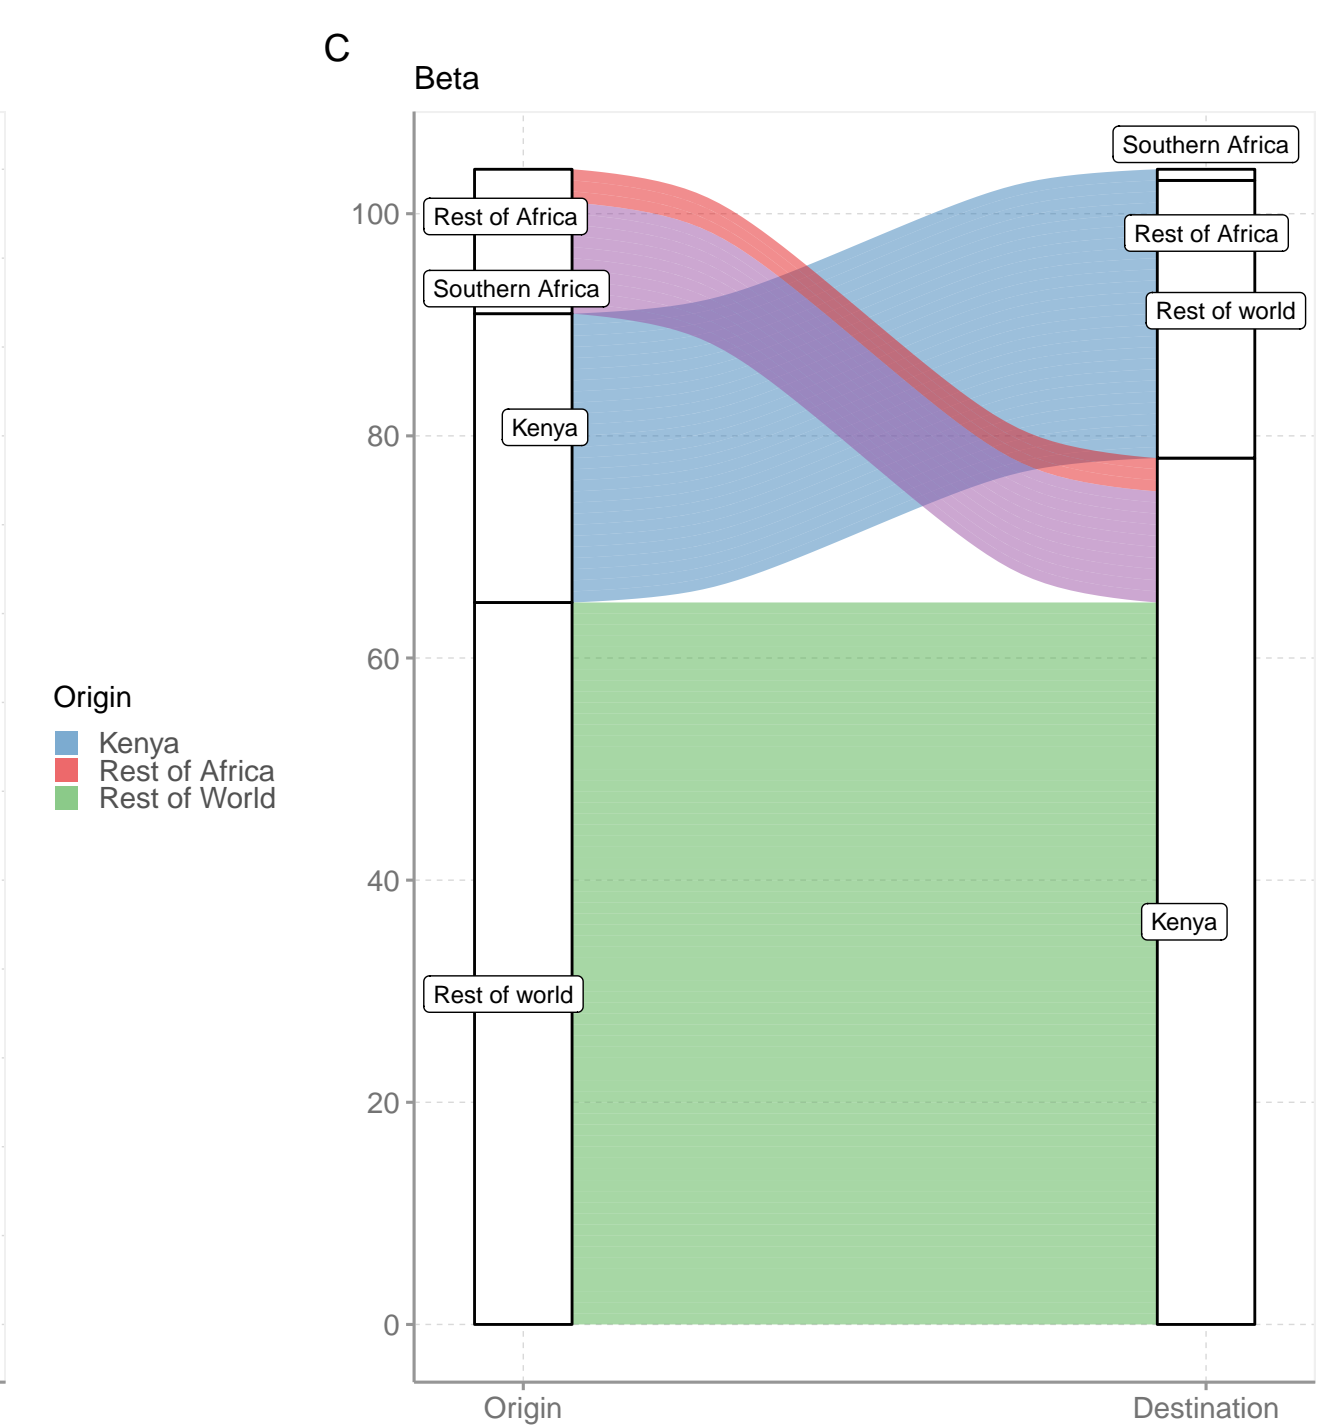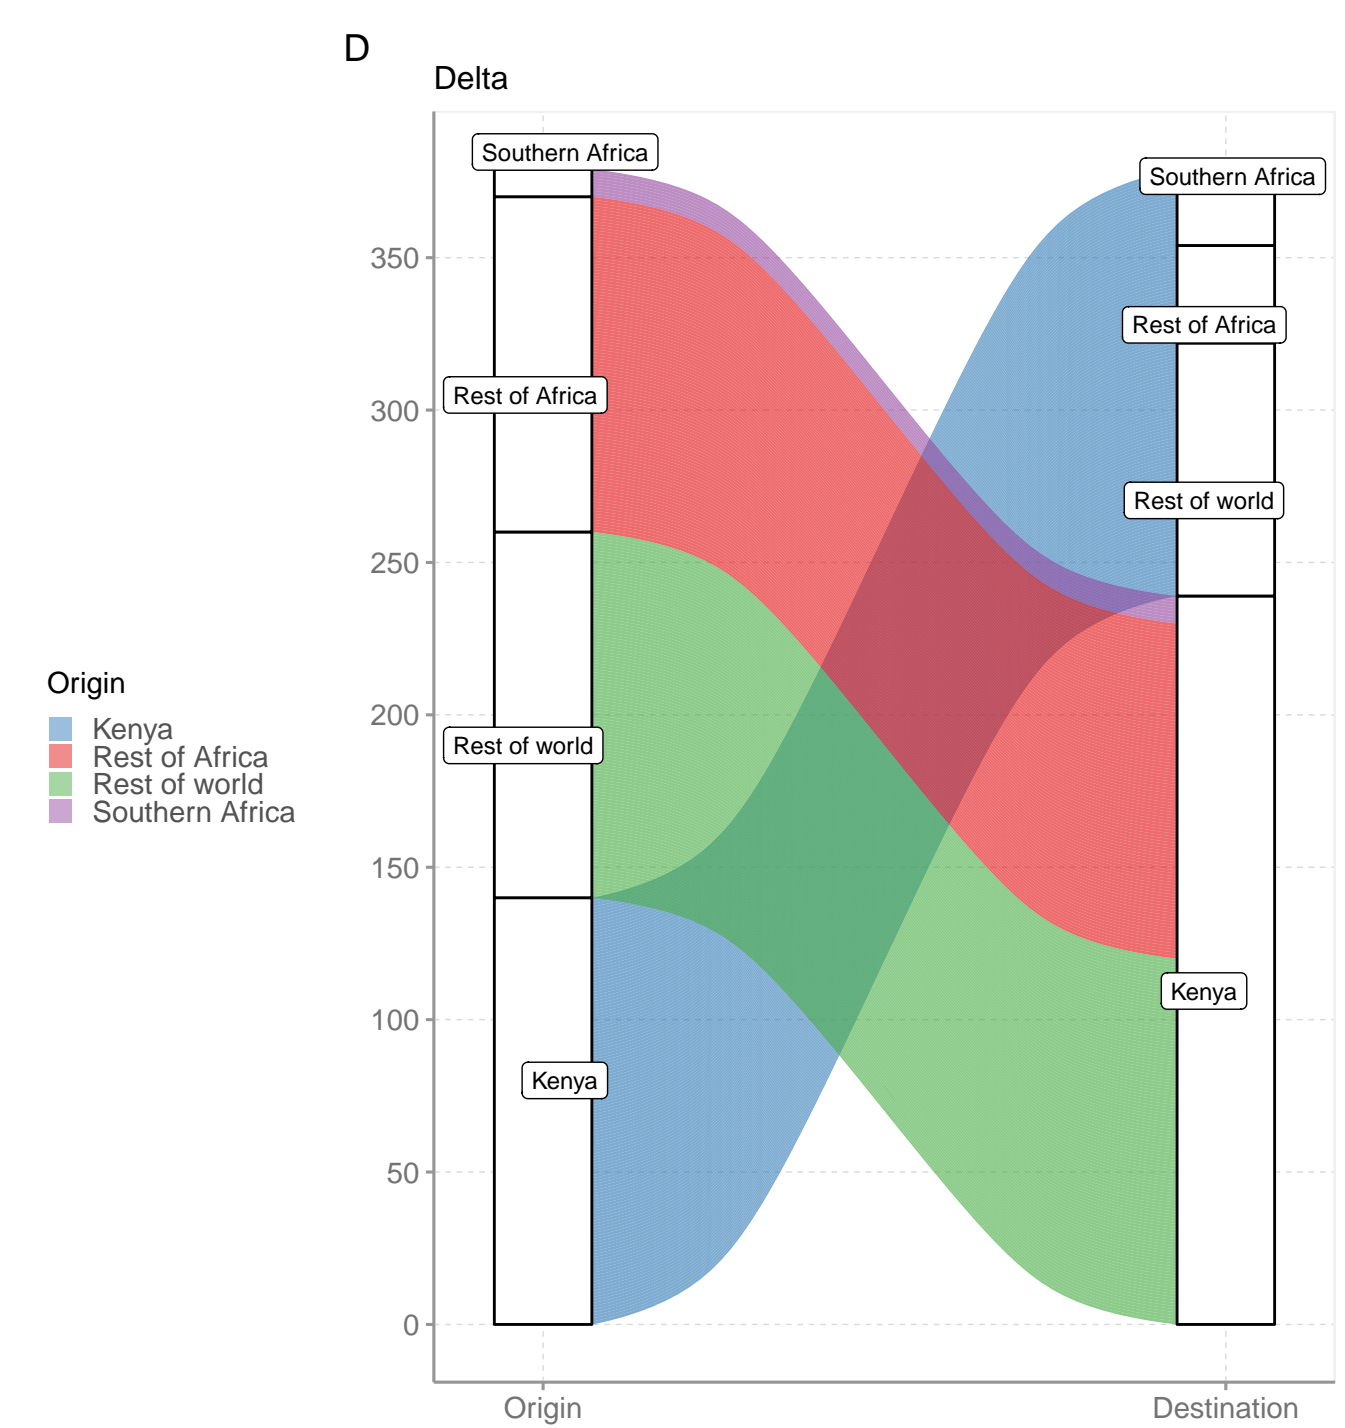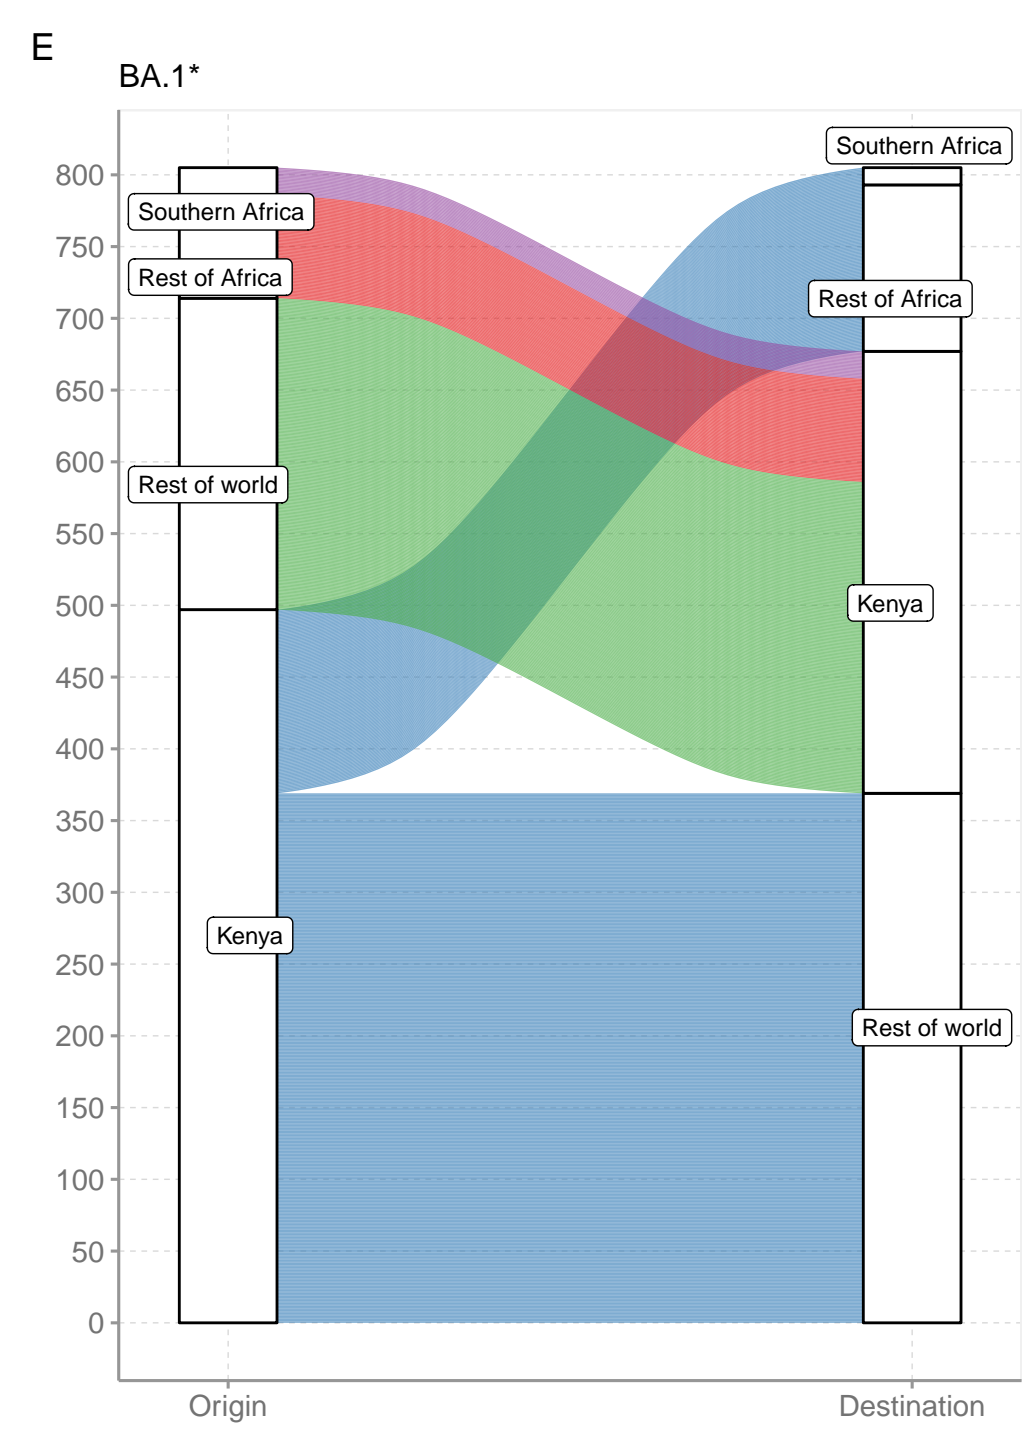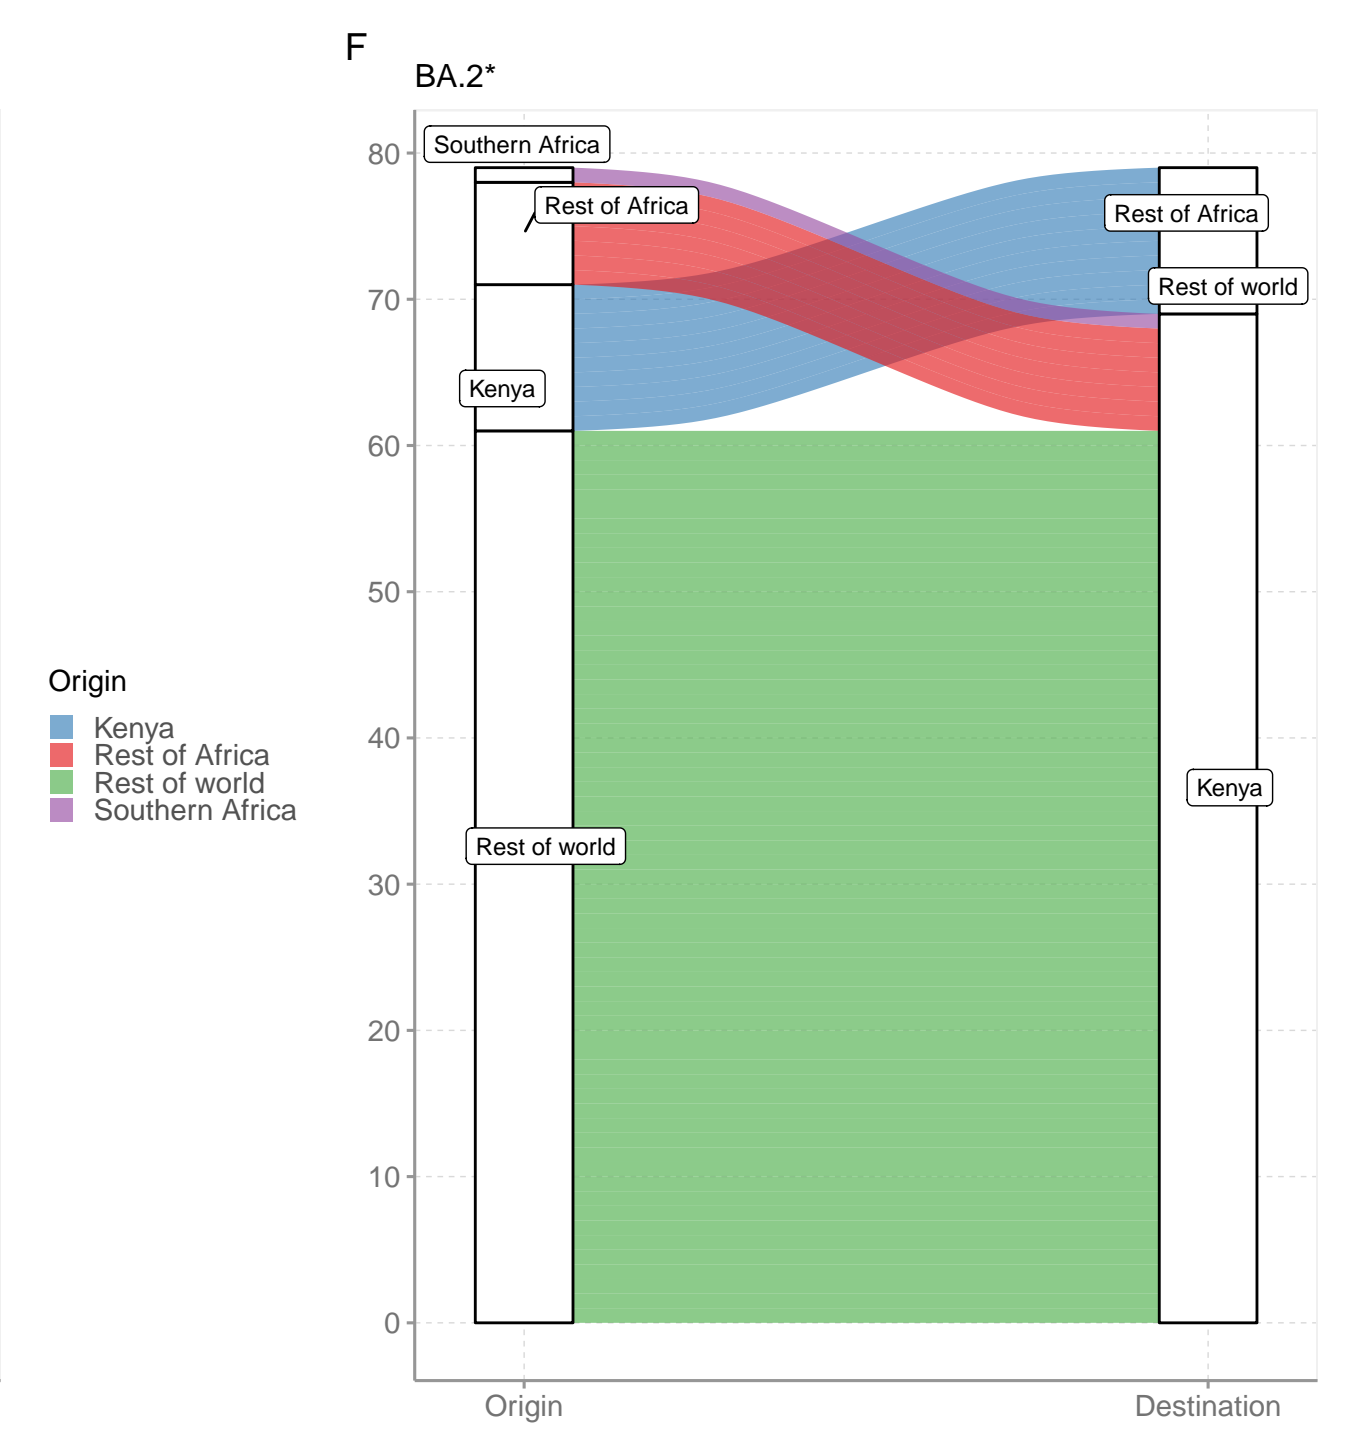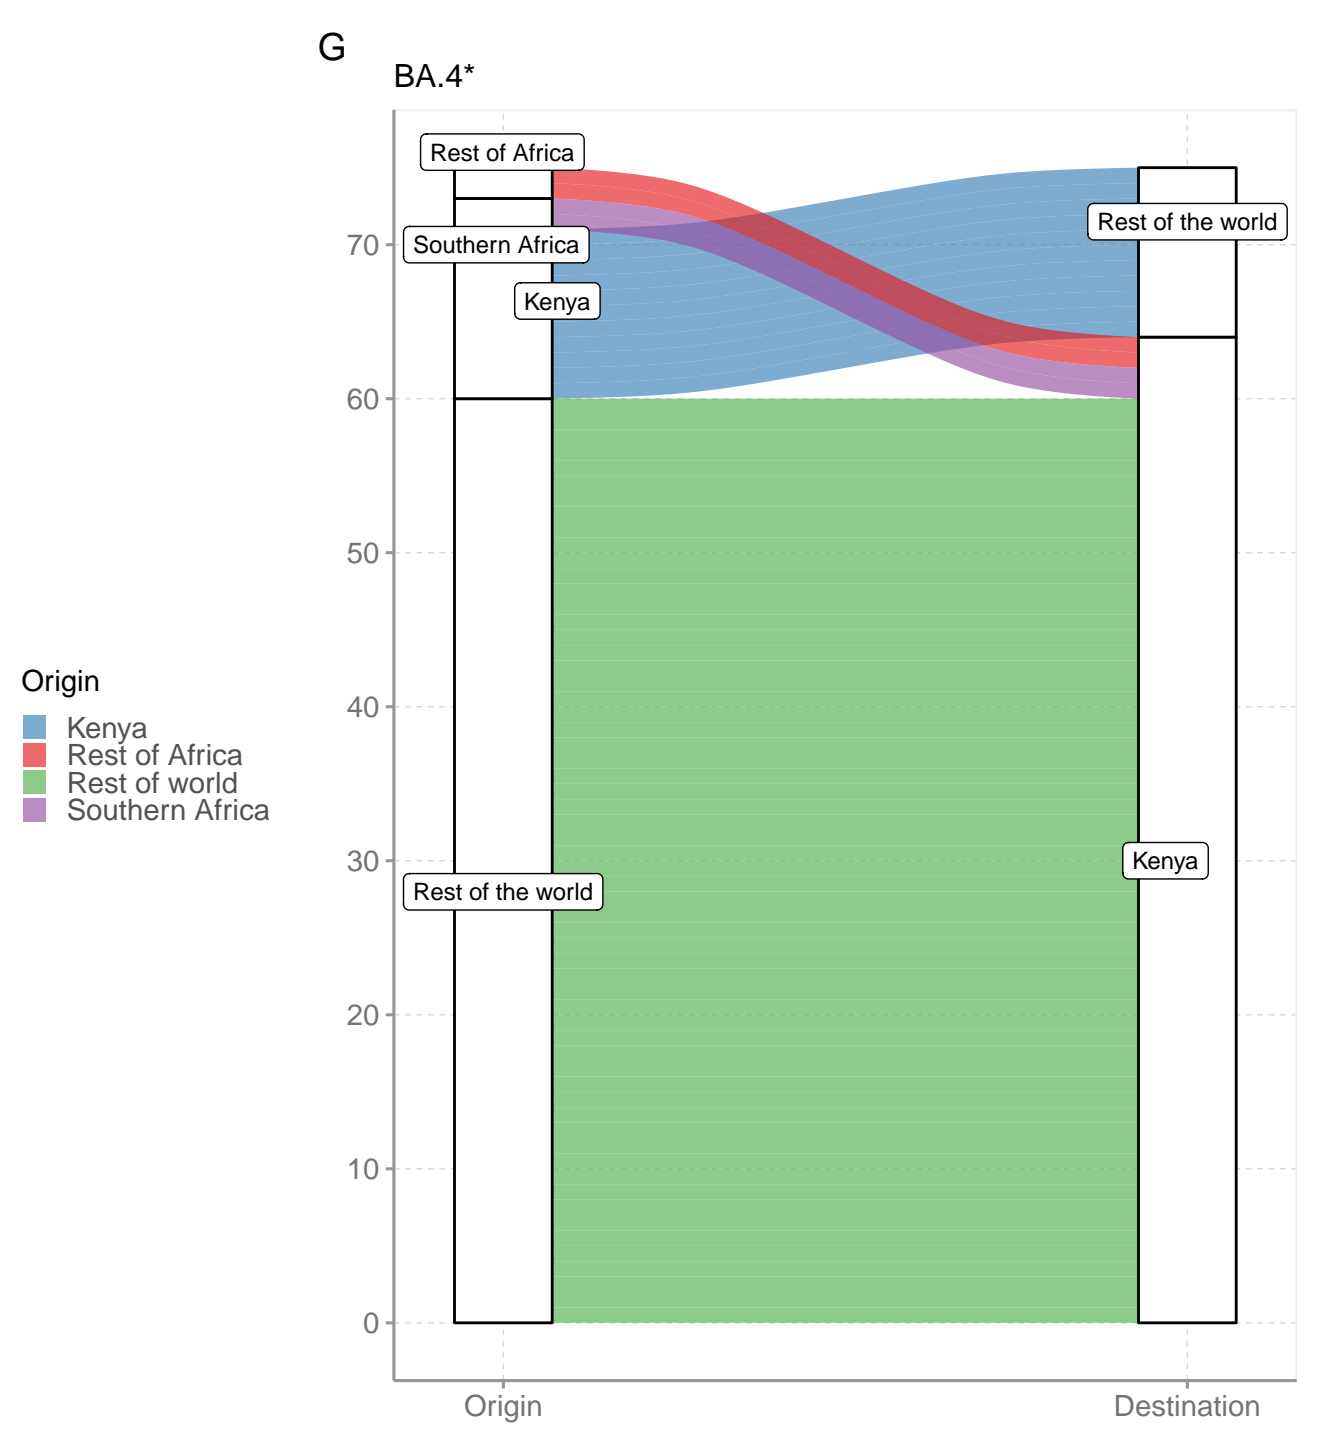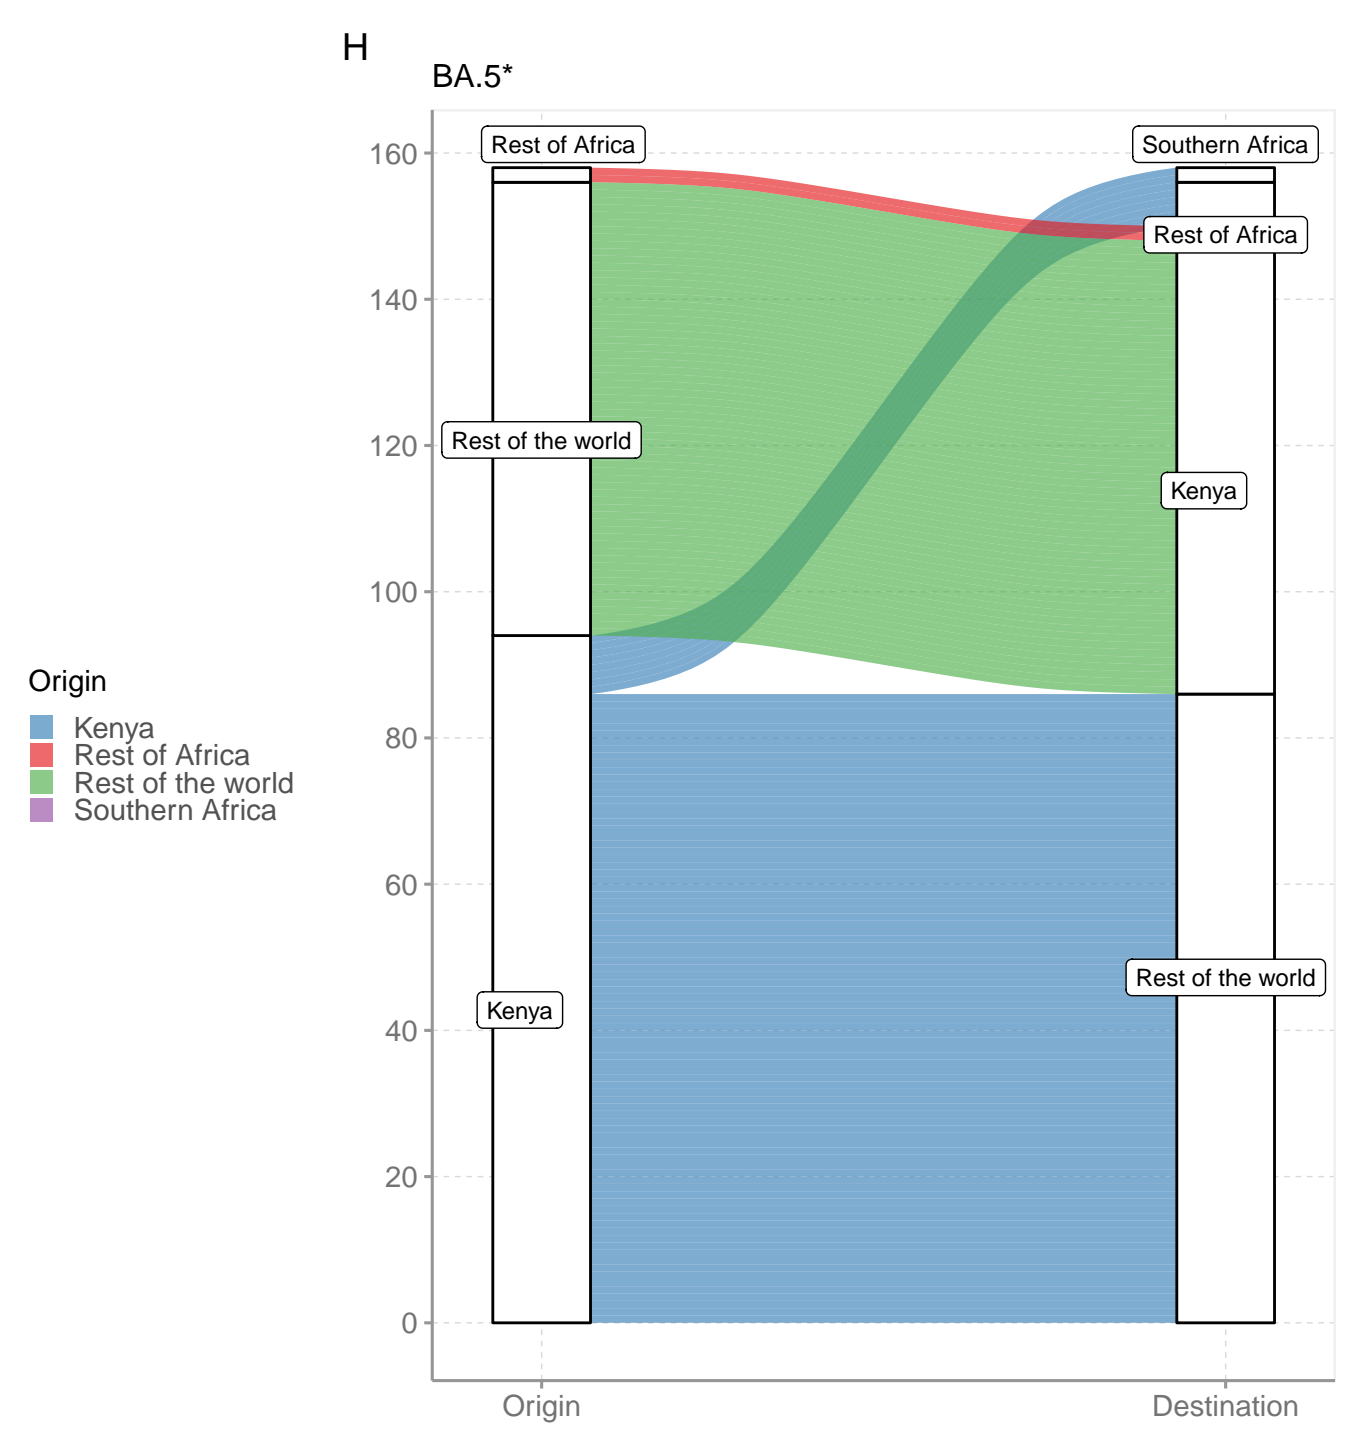

Supplement: Supplementary file [file media-3.pdf]
